# Supplementary material for: Locust density shapes energy metabolism and oxidative stress resulting in divergence of flight traits
Source: PubMed Central journal article supplement — Proc Natl Acad Sci U S A. 2021 Dec 27;119(1):e2115753118. doi: 10.1073/pnas.2115753118 (PMC8740713; doi:10.1073/pnas.2115753118), 2021-12-27
Supplement: pnas.2115753118.sapp.pdf [file pnas.2115753118.sapp.pdf]

1  
2  
3  
4  
5  
6  
7  
8  
9  
10  
11  
12  
13  
14  
15  
16  
17  
18  
19  
20  
21  
22  
23  
24  
25  
26  
27  
28  
29  
30  
31  
32  
33  
34  
35  
36  
37  
38  
39  
40  
41

**Supplementary Information for**

Locust density shapes energy metabolism and oxidative stress  
resulting in divergence of flight traits

Baozhen Du<sup>a,b,1</sup>, Ding Ding<sup>c,1</sup>, Chuan Ma<sup>c</sup>, Wei Guo<sup>b,c\*</sup> and Le Kang<sup>a,b,c\*</sup>

\* Correspondence and requests for materials should be addressed to Le Kang.  
Email: lkang@ioz.ac.cn

**This PDF file includes:**

Supplementary text  
Figures S1 to S8  
Tables S1 to S2

## 42 **Supplementary Information Text**

43 **Metabolomic Profiling, Data Processing, and Statistics.** About  $20 \pm 0.5$  mg of flight muscle  
44 tissue was weighed, transferred into a homogenizer tube, and mixed with 600  $\mu$ L prechilled  
45 methanol water mixture (8/2, v/v) for metabolism quenching. After mixing with 300  $\mu$ L of tissue  
46 homogenate, 900  $\mu$ L of methyl tert-butyl ether and 250  $\mu$ L ddH<sub>2</sub>O, samples were centrifuged for 15  
47 min. After centrifugation, 300  $\mu$ L of the top layer containing lipid and 250  $\mu$ L of the bottom layer  
48 containing polar metabolites were transferred out and freeze dried, respectively. Polar metabolites  
49 extracts were reconstituted with 150  $\mu$ L methanol water mixture (8/2, v/v) and then split into three  
50 fractions for three different analytical methods as described below. Furthermore, lipid extracts were  
51 redissolved with 250  $\mu$ L of acetonitrile and isopropanol mixture solution (5/5, v/v; containing 20%  
52 hexane) for untargeted lipidomic analyses.

53 Muscle extract samples were submitted to the meta-Phenotyper™ high-definition metabolomic  
54 platform developed by iPhenome Biotechnology (Dalian, China), in which five complementary  
55 analytical methods based on UPLC-HRMS were used. Untargeted metabolomic analyses were  
56 conducted on an Ultimate™ 3000 UHPLC system coupled to a Q Exactive™ quadrupole Orbitrap  
57 mass spectrometer (Thermo Scientific, San Jose, CA, USA). In a typical procedure, the first fraction  
58 of polar extracts was separated using an ACE Excel PFP-C18 column (Advanced Chromatography  
59 Technologies Ltd., Aberdeen, Scotland,  $2.1 \times 100$  mm<sup>2</sup>) and eluted with 0.1% formate/water and  
60 0.1% formate/acetonitrile through linear gradient ramping from 2% organic mobile phase to 98% in  
61 12 min. Detection was performed under positive electrospray mode. The second fraction  
62 comprising water and ammonium acetonitrile/methanol both containing 5 mM ammonium  
63 bicarbonate buffer salt was used to elute metabolites separated on an Acquity HSS C18 column  
64 (Waters Corporation, Milford, USA;  $1.7 \mu$ m,  $2.1 \times 100$  mm<sup>2</sup>), and finally detected under negative  
65 electrospray mode. The third polar fraction was analyzed by hydrophilic interaction chromatography  
66 on an Acquity BEH Amide column (Waters Corporation, Milford, USA;  $1.7 \mu$ m,  $2.1 \times 100$  mm<sup>2</sup>) and  
67 detected under negative electrospray ionization mode, in which 10% acetonitrile as weak eluent  
68 and 50% acetonitrile as strong eluent were mixed with 10 mM ammonium acetate as buffer salt to  
69 improve separation. Untargeted lipidomic analyses were performed under the same  
70 chromatographic separation conditions operated under positive and negative ionization detection  
71 modes, respectively. An Accucore C30 core-shell column (Thermo Scientific, Bellefonte, USA;  $2.6$   
72  $\mu$ m,  $2.1 \times 100$  mm<sup>2</sup>) was utilized for lipid molecule separation. A binary mobile phase comprising  
73 60% acetonitrile in water and 10% acetonitrile in isopropanol both containing 10 mM ammonium  
74 formate and 0.1% formate was used to elute lipid molecules. In all profiling methods, full-scan  
75 mass-spectral data under 70 000 FWHM resolution and the top 10 full-scan data-dependent  
76 MS/MS spectra data were acquired with XCalibur software (Thermo Scientific, San Jose, CA, USA).

77 The peaks were further processed with Compound Discoverer software (Thermo Scientific,  
78 San Jose, CA, USA) for metabolic component extraction. The polar metabolites were structurally  
79 annotated by searching against a local HMDB metabolite database and a local proprietary MS/MS  
80 spectrum library (Small Molecule Orbitrap-based Library) created using authentic standards and  
81 the online mzCloud library ([www.mzcloud.org](http://www.mzcloud.org)). Multiple chemical information including exact mass  
82 of precursor, isotopic pattern fit score, MS/MS spectra similarity, and retention time was obtained  
83 for metabolites structure annotation. Moreover, untargeted lipidomics data were processed with  
84 LipidSearch software including peak picking and lipid identification. The acquired MS<sup>2</sup> spectra were  
85 searched against in silico predicted spectra of diverse endogenous lipid classes. Lipid identification  
86 was strictly manually checked and investigated one by one to eliminate false positives chiefly  
87 basing on peak shake, adduct ions behavior, fragmentation pattern, and chromatographic behavior.  
88 Finally, the resultant quantitative information from all measurements was merged and those  
89 detected with multiple methods were excluded to guarantee the uniqueness of metabolite and lipid  
90 for final statistical analysis. Principal component analysis and orthogonal partial-least-square-  
91 discriminant analysis were performed with SIMCA-P software (Sartorius Umetrics, Germany).  
92 Metabolic pathway enrichment analysis was conducted on the MetaboAnalyst website.

93  
94  
95

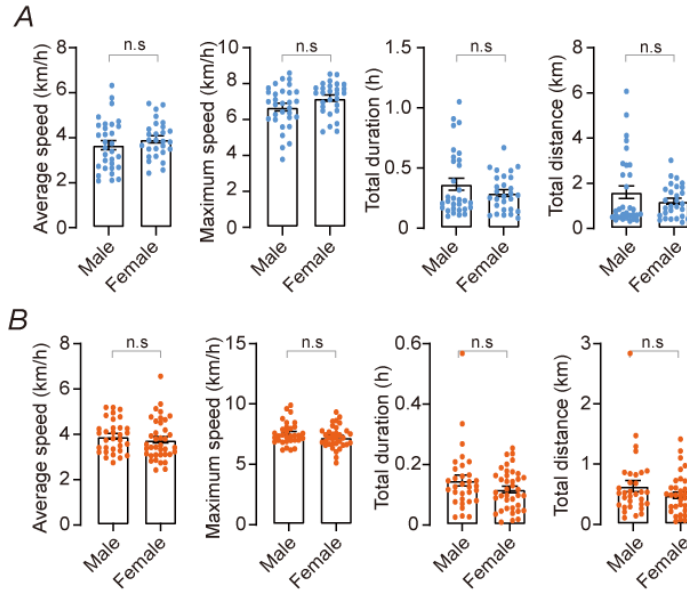

96

97 **Fig. S1.** Comparison of flight traits between male and female locusts. Flight trait divergence  
 98 between male and female in (A) gregarious and (B) solitary locusts. Blue point represents the  
 99 gregarious individual and red point represents the solitary individual. All data are presented as the  
 100 mean  $\pm$  SEM, n.s, not significant.

101

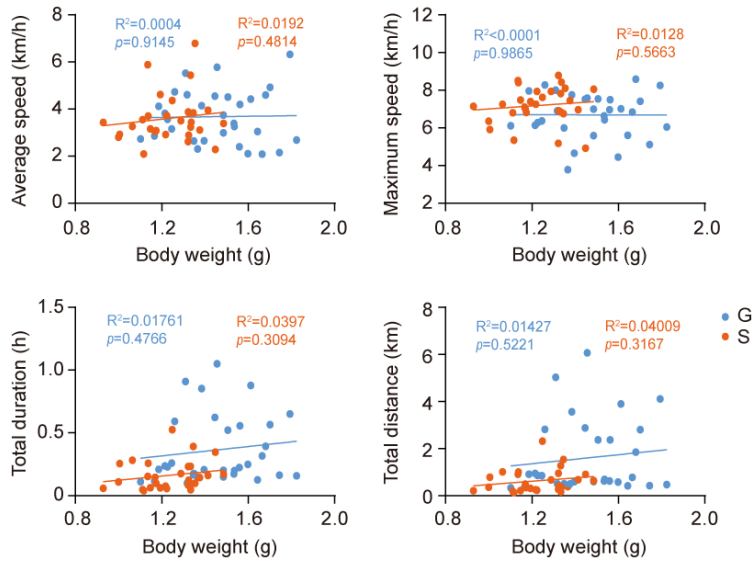

102

103 **Fig. S2.** Linear regression analysis of flight traits and body weight in gregarious and solitary locusts.  
 104 Blue point represents the gregarious individual (G) and red point represents the solitary individual  
 105 (S). Pearson correlation coefficients ( $R^2$ ) and  $p$  values are presented. All data are presented as the  
 106 mean  $\pm$  SEM.

107

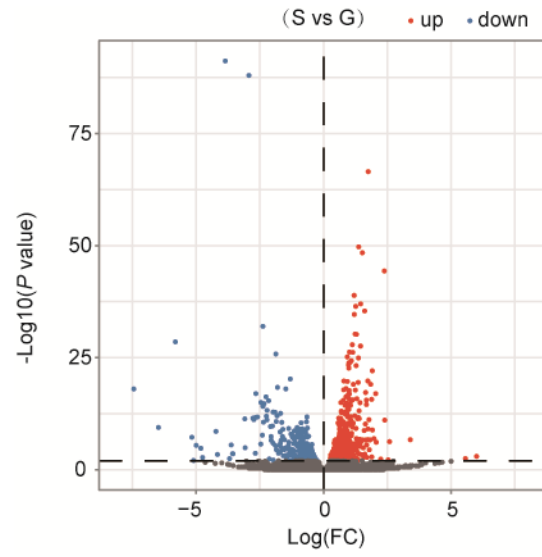

108

109 **Fig. S3.** Volcano plot of differential expression genes (DEGs) in flight muscles. DEGs with  $p < 0.01$   
110 were selected in solitary locusts (red point) and gregarious locusts (blue point). G and S represent  
111 gregarious and solitary locusts, respectively.  
112

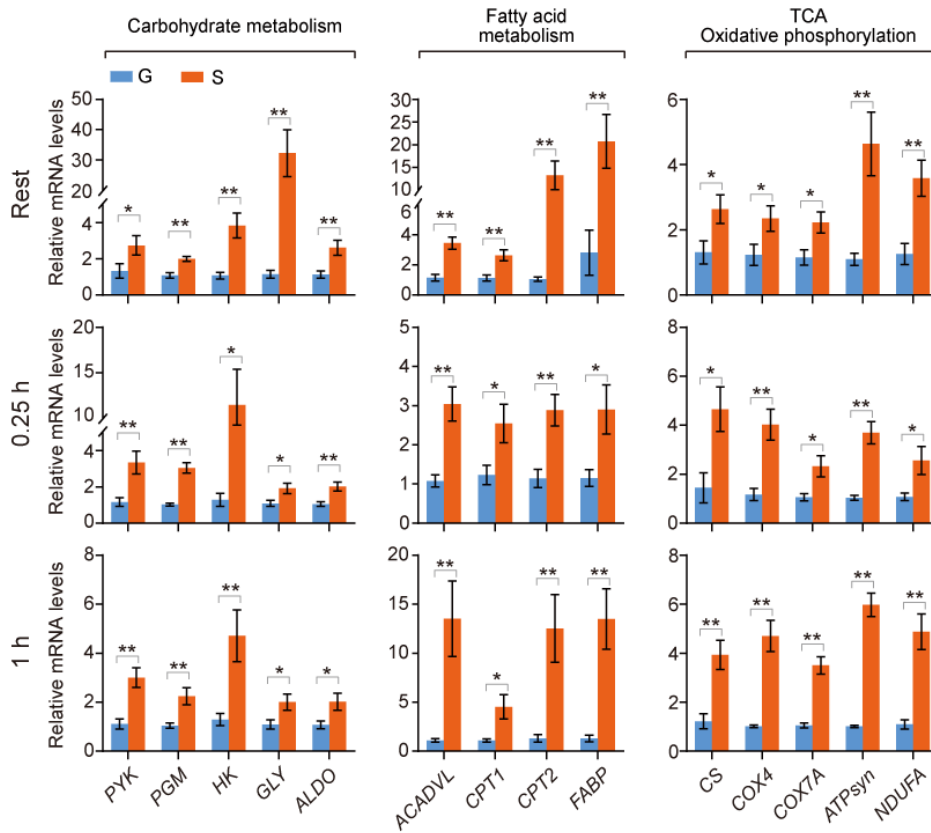

113

114 **Fig. S4.** qPCR verification of energy metabolism genes. Error bars represent the SEM. Significant  
 115 differences are denoted by \* $p < 0.05$ , \*\* $p < 0.01$  ( $n = 8$ , Student's  $t$  test). Abbreviations: S, solitary;  
 116 G, gregarious; PYK, pyruvate kinase; PGM; phosphoglucomutase; HK, hexokinase; GLY, glycogen  
 117 phosphorylase; ALDO, fructose-bisphosphate aldolase; ACADVL, very long-chain specific acyl-  
 118 CoA dehydrogenase; CPT, carnitine O-palmitoyl transferase; FABP, fatty acid binding protein; CS,  
 119 citrate synthase; COX, cytochrome c oxidase subunit; ATPsyn, ATP synthase; NDUFA, NADH  
 120 dehydrogenase subcomplex subunit. All data are presented as the mean  $\pm$  SEM, \*  $p < 0.05$ , \*\*  $p <$   
 121 0.01.

122

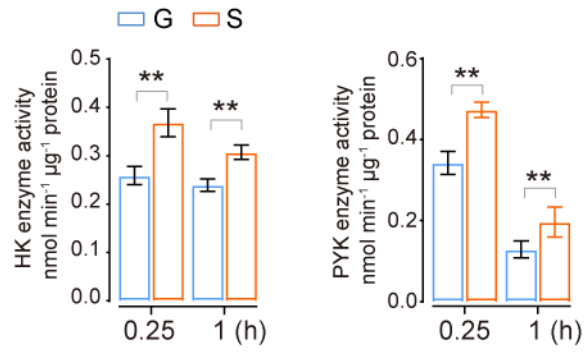

123

124 **Fig. S5.** Comparison of enzyme activities of hexokinase and pyruvate kinase during the flight  
 125 process between gregarious and solitary locusts (n = 8 replicates, 3 locusts/replicate, Student's t  
 126 test). G and S represent gregarious and solitary locusts, respectively. All data are presented as the  
 127 mean ± SEM, \**p* < 0.05, \*\**p* < 0.01.

128

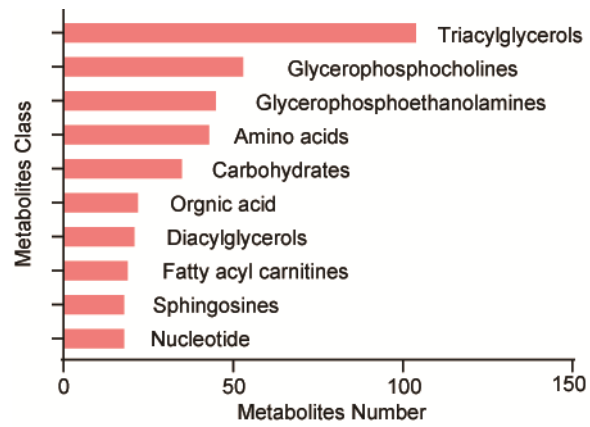

129

130 **Fig. S6.** Metabolite class analysis of all differential metabolites after flight treatment. Metabolites  
 131 with a *p* value of less than 0.05 are included.

132



133

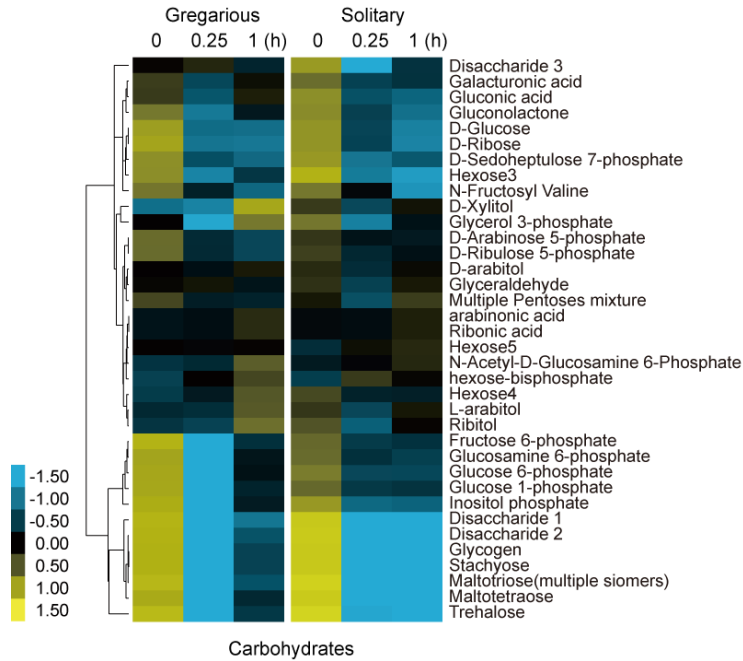

134

135 **Fig. S7.** The variation of carbohydrates after flight treatment between gregarious and solitary  
136 locusts. Yellow and blue signals represent higher and lower levels, respectively. The dendrograms  
137 generated by the hierarchical clustering of metabolites are also provided. Heat-map signal indicates  
138  $\log_2$  fold-change value relative to the median expression level within the gregarious and solitary  
139 groups, respectively.

140

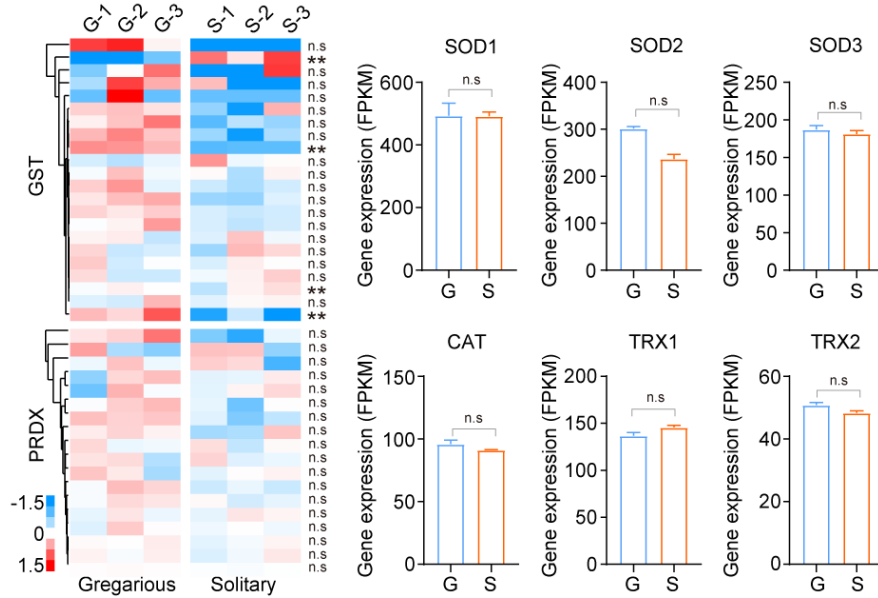

141  
142  
143  
144  
145  
146  
147  
148

**Fig.S8.** Comparison of antioxidant genes expression between gregarious and solitary locusts. Red signal represents higher expression, whereas blue represents lower expression. GST, Glutathione S-transferase; PRDX, Peroxiredoxin; SOD, Superoxide dismutase; CAT, Catalase; TRX, Thioredoxin reductase; G, gregarious locusts; S, solitary locusts. (n = 3 replicates, 6 locusts/replicate). Student's *t* test. Mean  $\pm$  SEM. Significant differences are denoted by \* $p < 0.05$ , \*\* $p < 0.01$ , and n.s, not significant.

149  
150  
151  
152

**Table S1.** The list of metabolites that have different abundance after 0.25 or 1 h flight treatment in flight muscle. G and S represent gregarious and solitary locusts, respectively. 0/0.25 h, 0/1 h represent different time flight treatments compared to the rest condition samples. Five biological replicates for each flight treatment time point, and each replicate contains six locusts.

| Metabolite                  | Class            | G: 0/0.25 h<br>(p value) | G: 0/1 h<br>(p value) | S: 0/0.25 h<br>(p value) | S: 0/1 h<br>(p value) |
|-----------------------------|------------------|--------------------------|-----------------------|--------------------------|-----------------------|
| WE(23:4)_WE(23:4)           | Wax monoesters   | 0.0430                   | 0.0084                | 0.0259                   | 0.0023                |
| Pantothenic acid            | Vitamin          | 0.0235                   | 0.1434                | 0.4497                   | 0.4717                |
| Riboflavin                  | Vitamin          | 0.6567                   | 0.2964                | 0.0014                   | 0.1010                |
| Trigonelline                | Vitamin          | 0.4828                   | 0.2025                | 0.1582                   | 0.0264                |
| Coenzyme Q10                | Ubiquinones      | 0.8542                   | 0.0082                | 0.0473                   | 0.0883                |
| Coenzyme Q9                 | Ubiquinones      | 0.6794                   | 0.0773                | 0.0661                   | 0.0450                |
| TG(42:0)_TG(16:0/12:0/14:0) | Triacylglycerols | 0.8021                   | 0.0269                | 0.0439                   | 0.3545                |
| TG(42:1)_TG(14:0/14:1/14:0) | Triacylglycerols | 0.7233                   | 0.4192                | 0.0216                   | 0.7047                |
| TG(44:0)_TG(16:0/14:0/14:0) | Triacylglycerols | 0.3806                   | 0.0305                | 0.0220                   | 0.0520                |
| TG(44:3)_TG(16:0/10:0/18:3) | Triacylglycerols | 0.2189                   | 0.0479                | 0.1125                   | 0.7380                |
| TG(45:0)_TG(15:0/14:0/16:0) | Triacylglycerols | 0.3460                   | 0.0334                | 0.4641                   | 0.5279                |
| TG(45:2)_TG(15:0/16:1/14:1) | Triacylglycerols | 0.3677                   | 0.2293                | 0.0002                   | 0.0004                |
| TG(45:3)_TG(15:1/15:1/15:1) | Triacylglycerols | 0.2480                   | 0.0511                | 0.0107                   | 0.0125                |
| TG(46:1)_TG(14:0/18:1/14:0) | Triacylglycerols | 0.1910                   | 0.0223                | 0.0352                   | 0.0547                |
| TG(46:1)_TG(16:0/12:0/18:1) | Triacylglycerols | 0.1910                   | 0.0223                | 0.0352                   | 0.0547                |
| TG(46:1)_TG(16:0/14:0/16:1) | Triacylglycerols | 0.1910                   | 0.0223                | 0.0352                   | 0.0547                |
| TG(46:2)_TG(10:0/18:1/18:1) | Triacylglycerols | 0.2938                   | 0.1007                | 0.0048                   | 0.0122                |
| TG(46:3)_TG(10:0/18:1/18:2) | Triacylglycerols | 0.5917                   | 0.3280                | 0.0317                   | 0.1185                |
| TG(46:3)_TG(16:0/12:0/18:3) | Triacylglycerols | 0.2902                   | 0.0366                | 0.1357                   | 0.1834                |
| TG(47:2)_TG(14:0/15:0/18:2) | Triacylglycerols | 0.9449                   | 0.2158                | 0.0117                   | 0.1907                |
| TG(47:3)_TG(12:0/17:1/18:2) | Triacylglycerols | 0.1346                   | 0.6200                | 0.0066                   | 0.0365                |
| TG(47:4)_TG(12:0/17:1/18:3) | Triacylglycerols | 0.3706                   | 0.0468                | 0.2764                   | 0.1655                |
| TG(48:1)_TG(16:0/14:0/18:1) | Triacylglycerols | 0.1557                   | 0.0405                | 0.0325                   | 0.0122                |
| TG(48:2)_TG(12:0/18:1/18:1) | Triacylglycerols | 0.3230                   | 0.1079                | 0.0022                   | 0.0067                |
| TG(48:2)_TG(16:0/14:0/18:2) | Triacylglycerols | 0.3230                   | 0.1079                | 0.0022                   | 0.0067                |
| TG(48:2)_TG(16:1/14:0/18:1) | Triacylglycerols | 0.3388                   | 0.0377                | 0.0658                   | 0.0421                |
| TG(48:3)_TG(14:0/18:3/16:0) | Triacylglycerols | 0.2965                   | 0.0148                | 0.1104                   | 0.1245                |
| TG(48:3)_TG(18:1/12:0/18:2) | Triacylglycerols | 0.2496                   | 0.1222                | 0.3382                   | 0.0422                |
| TG(48:5)_TG(12:0/18:2/18:3) | Triacylglycerols | 0.2922                   | 0.0348                | 0.2514                   | 0.2036                |
| TG(48:6)_TG(12:0/18:3/18:3) | Triacylglycerols | 0.2311                   | 0.0224                | 0.0523                   | 0.2290                |
| TG(49:0)_TG(16:0/16:0/17:0) | Triacylglycerols | 0.6819                   | 0.1358                | 0.0020                   | 0.0088                |
| TG(49:1)_TG(49:1)           | Triacylglycerols | 0.3361                   | 0.1340                | 0.0335                   | 0.0460                |
| TG(49:2)_TG(15:0/16:0/18:2) | Triacylglycerols | 0.1264                   | 0.0282                | 0.0021                   | 0.0038                |
| TG(49:2)_TG(15:0/16:1/18:1) | Triacylglycerols | 0.1490                   | 0.0482                | 0.0023                   | 0.0049                |
| TG(49:3)_TG(15:0/16:0/18:3) | Triacylglycerols | 0.1670                   | 0.0293                | 0.1573                   | 0.1037                |
| TG(49:4)_TG(14:0/20:4/15:0) | Triacylglycerols | 0.4407                   | 0.0404                | 0.3330                   | 0.3702                |
| TG(50:1)_TG(16:0/16:0/18:1) | Triacylglycerols | 0.1130                   | 0.0258                | 0.2949                   | 0.0404                |
| TG(50:2)_TG(16:0/16:0/18:2) | Triacylglycerols | 0.3324                   | 0.2126                | 0.0047                   | 0.0158                |
| TG(50:3)_TG(16:0/16:0/18:3) | Triacylglycerols | 0.0965                   | 0.0223                | 0.4540                   | 0.3332                |
| TG(50:3)_TG(16:1/16:1/18:1) | Triacylglycerols | 0.3104                   | 0.1397                | 0.0050                   | 0.0082                |
| TG(50:5)_TG(14:0/18:2/18:3) | Triacylglycerols | 0.2826                   | 0.0494                | 0.1686                   | 0.1970                |
| TG(50:6)_TG(14:0/14:0/22:6) | Triacylglycerols | 0.4222                   | 0.0139                | 0.0154                   | 0.0350                |
| TG(50:6)_TG(14:0/18:3/18:3) | Triacylglycerols | 0.4479                   | 0.0123                | 0.0331                   | 0.0713                |
| TG(51:0)_TG(18:0/16:0/17:0) | Triacylglycerols | 0.8372                   | 0.0848                | 0.0001                   | 0.0004                |
| TG(51:1)_TG(15:0/20:0/16:1) | Triacylglycerols | 0.3433                   | 0.3455                | 0.0326                   | 0.0034                |
| TG(51:1)_TG(16:0/17:0/18:1) | Triacylglycerols | 0.4212                   | 0.0829                | 0.0005                   | 0.0010                |
| TG(51:2)_TG(16:0/17:0/18:2) | Triacylglycerols | 0.3874                   | 0.1063                | 0.0003                   | 0.0011                |
| TG(51:2)_TG(16:0/17:1/18:1) | Triacylglycerols | 0.3549                   | 0.0270                | 0.4340                   | 0.4500                |
| TG(51:3)_TG(15:0/18:1/18:2) | Triacylglycerols | 0.3404                   | 0.0088                | 0.8739                   | 0.4009                |
| TG(51:4)_TG(16:0/17:1/18:3) | Triacylglycerols | 0.7647                   | 0.0106                | 0.0120                   | 0.0407                |
| TG(51:5)_TG(15:0/18:2/18:3) | Triacylglycerols | 0.3124                   | 0.0645                | 0.0369                   | 0.0052                |
| TG(52:0)_TG(18:0/16:0/18:0) | Triacylglycerols | 0.4414                   | 0.0375                | 0.0028                   | 0.0088                |
| TG(52:1)_TG(18:0/16:0/18:1) | Triacylglycerols | 0.2456                   | 0.0687                | 0.0170                   | 0.0286                |
| TG(52:2)_TG(18:0/16:0/18:2) | Triacylglycerols | 0.4035                   | 0.1723                | 0.0254                   | 0.0354                |
| TG(52:2p)_TG(52:2p)         | Triacylglycerols | 0.7370                   | 0.8133                | 0.0767                   | 0.0172                |
| TG(52:3)_TG(16:0/18:1/18:2) | Triacylglycerols | 0.6303                   | 0.0620                | 0.0156                   | 0.0568                |
| TG(52:3)_TG(16:1/18:1/18:1) | Triacylglycerols | 0.3668                   | 0.2427                | 0.0034                   | 0.0087                |
| TG(52:3)_TG(18:0/16:0/18:3) | Triacylglycerols | 0.6303                   | 0.0620                | 0.0156                   | 0.0568                |
| TG(52:4)_TG(16:0/18:1/18:3) | Triacylglycerols | 0.3783                   | 0.1425                | 0.2076                   | 0.0032                |
| TG(52:5)_TG(16:0/18:2/18:3) | Triacylglycerols | 0.3321                   | 0.1055                | 0.0497                   | 0.0487                |
| TG(52:8)_TG(14:0/18:3/20:5) | Triacylglycerols | 0.4384                   | 0.0733                | 0.0126                   | 0.8178                |
| TG(52:9)_TG(12:0/18:3/22:6) | Triacylglycerols | 0.4850                   | 0.0560                | 0.0016                   | 0.0255                |
| TG(53:0)_TG(17:0/18:0/18:0) | Triacylglycerols | 0.6612                   | 0.3015                | 0.0009                   | 0.0030                |
| TG(53:1)_TG(15:0/22:0/16:1) | Triacylglycerols | 0.3236                   | 0.1590                | 0.0023                   | 0.0034                |
| TG(53:1)_TG(17:0/18:0/18:1) | Triacylglycerols | 0.4778                   | 0.0540                | 0.0001                   | 0.0003                |
| TG(53:2)_TG(17:0/18:1/18:1) | Triacylglycerols | 0.3836                   | 0.0903                | 0.0005                   | 0.0013                |
| TG(53:3)_TG(17:0/18:1/18:2) | Triacylglycerols | 0.4120                   | 0.1232                | 0.0002                   | 0.0008                |
| TG(53:3)_TG(17:1/18:1/18:1) | Triacylglycerols | 0.9483                   | 0.6142                | 0.3509                   | 0.0245                |
| TG(53:4)_TG(17:1/18:1/18:2) | Triacylglycerols | 0.3882                   | 0.1502                | 0.0005                   | 0.0026                |
| TG(53:5)_TG(17:0/18:2/18:3) | Triacylglycerols | 0.1873                   | 0.0601                | 0.0093                   | 0.0185                |
| TG(53:5)_TG(17:1/18:1/18:3) | Triacylglycerols | 0.1873                   | 0.0601                | 0.0093                   | 0.0185                |
| TG(53:6)_TG(15:0/16:1/22:5) | Triacylglycerols | 0.1935                   | 0.0763                | 0.0161                   | 0.0542                |

|                                            |                  |        |        |        |        |
|--------------------------------------------|------------------|--------|--------|--------|--------|
| TG(53:6)_TG(17:0/18:3/18:3)                | Triacylglycerols | 0.3636 | 0.1306 | 0.0003 | 0.0024 |
| TG(53:7)_TG(17:1/18:3/18:3)                | Triacylglycerols | 0.2817 | 0.3360 | 0.0030 | 0.0107 |
| TG(54:0)_TG(18:0/18:0/18:0)                | Triacylglycerols | 0.5360 | 0.2934 | 0.0062 | 0.0125 |
| TG(54:1)_TG(18:0/18:0/18:1)                | Triacylglycerols | 0.4329 | 0.0707 | 0.0193 | 0.0286 |
| TG(54:2)_TG(18:0/18:0/18:2)                | Triacylglycerols | 0.4551 | 0.1150 | 0.0008 | 0.0022 |
| TG(54:2)_TG(18:0/18:1/18:1)                | Triacylglycerols | 0.2572 | 0.0890 | 0.0173 | 0.0330 |
| TG(54:3)_TG(18:0/18:0/18:3)                | Triacylglycerols | 0.6248 | 0.0210 | 0.0013 | 0.0039 |
| TG(54:3)_TG(18:0/18:1/18:2)                | Triacylglycerols | 0.4032 | 0.2518 | 0.0019 | 0.0038 |
| TG(54:3)_TG(18:1/18:1/18:1)                | Triacylglycerols | 0.2674 | 0.1159 | 0.0290 | 0.0568 |
| TG(54:4)_TG(18:0/18:2/18:2)                | Triacylglycerols | 0.4746 | 0.0954 | 0.0014 | 0.0024 |
| TG(54:4)_TG(18:1/18:1/18:2)                | Triacylglycerols | 0.4008 | 0.2931 | 0.0813 | 0.0547 |
| TG(54:5)_TG(16:0/18:1/20:4)                | Triacylglycerols | 0.3779 | 0.0781 | 0.0022 | 0.0025 |
| TG(54:6)_TG(16:0/18:1/20:5)                | Triacylglycerols | 0.4988 | 0.0375 | 0.2688 | 0.9878 |
| TG(54:6)_TG(18:1/18:2/18:3)                | Triacylglycerols | 0.9395 | 0.5060 | 0.9956 | 0.0002 |
| TG(54:7)_TG(16:1/18:2/20:4)                | Triacylglycerols | 0.4386 | 0.1620 | 0.0410 | 0.0016 |
| TG(54:7)_TG(18:1/18:3/18:3)                | Triacylglycerols | 0.2024 | 0.0556 | 0.3480 | 0.5015 |
| TG(54:9)_TG(18:3/18:3/18:3)                | Triacylglycerols | 0.5583 | 0.0279 | 0.0064 | 0.0144 |
| TG(55:3)_TG(18:0/18:1/18:2)                | Triacylglycerols | 0.3231 | 0.1068 | 0.0001 | 0.0020 |
| TG(55:3)_TG(19:1/18:1/18:1)                | Triacylglycerols | 0.3549 | 0.0939 | 0.0013 | 0.0119 |
| TG(55:4)_TG(19:1/18:1/18:2)                | Triacylglycerols | 0.2969 | 0.0669 | 0.0025 | 0.0154 |
| TG(55:6)_TG(19:1/18:2/18:3)                | Triacylglycerols | 0.2203 | 0.0715 | 0.0054 | 0.0261 |
| TG(55:7)_TG(15:0/18:1/22:6)                | Triacylglycerols | 0.4032 | 0.1255 | 0.0010 | 0.0039 |
| TG(55:8)_TG(15:0/18:2/22:6)                | Triacylglycerols | 0.5084 | 0.1019 | 0.0005 | 0.0020 |
| TG(56:1)_TG(18:0/18:1/20:0)                | Triacylglycerols | 0.3133 | 0.1849 | 0.0083 | 0.0155 |
| TG(56:2)_TG(20:0/18:1/18:1)                | Triacylglycerols | 0.0407 | 0.1512 | 0.0235 | 0.0806 |
| TG(56:3)_TG(20:0/18:2/18:1)                | Triacylglycerols | 0.2591 | 0.2679 | 0.0007 | 0.0061 |
| TG(56:4)_TG(18:0/18:1/20:3)                | Triacylglycerols | 0.0705 | 0.0858 | 0.0441 | 0.0440 |
| TG(56:5)_TG(18:0/18:1/20:4)                | Triacylglycerols | 0.2228 | 0.1186 | 0.0042 | 0.0048 |
| TG(56:5)_TG(18:1/18:1/20:3)                | Triacylglycerols | 0.2271 | 0.2447 | 0.0016 | 0.1450 |
| TG(56:5)_TG(18:1/18:2/20:2)                | Triacylglycerols | 0.3685 | 0.1542 | 0.0005 | 0.0184 |
| TG(56:6)_TG(16:0/18:1/22:5)                | Triacylglycerols | 0.6162 | 0.0020 | 0.0303 | 0.3879 |
| TG(56:6)_TG(18:0/18:2/20:4)                | Triacylglycerols | 0.6861 | 0.0187 | 0.2818 | 0.7245 |
| TG(56:7)_TG(18:1/18:2/20:4)                | Triacylglycerols | 0.2462 | 0.0313 | 0.1282 | 0.3366 |
| TG(58:1)_TG(16:0/18:1/24:0)                | Triacylglycerols | 0.6348 | 0.5465 | 0.0014 | 0.0085 |
| TG(58:2)_TG(16:0/18:2/24:0)                | Triacylglycerols | 0.6832 | 0.2552 | 0.0019 | 0.0404 |
| TG(58:3)_TG(18:1/18:1/22:1)                | Triacylglycerols | 0.7294 | 0.2366 | 0.0004 | 0.0667 |
| TG(58:4)_TG(22:0/18:2/18:2)                | Triacylglycerols | 0.2732 | 0.1642 | 0.0009 | 0.2457 |
| TG(58:5)_TG(18:0/18:1/22:4)                | Triacylglycerols | 0.9674 | 0.7993 | 0.0107 | 0.0997 |
| TG(58:5)_TG(18:1/18:1/22:3)                | Triacylglycerols | 0.2463 | 0.1329 | 0.0107 | 0.0997 |
| TG(58:6)_TG(18:1/18:1/22:4)                | Triacylglycerols | 0.1815 | 0.0376 | 0.0990 | 0.9571 |
| TG(59:1)_TG(15:0/22:1/22:0)                | Triacylglycerols | 0.3861 | 0.0738 | 0.0016 | 0.0094 |
| Cer(d32:1)_Cer(d18:1/14:0)                 | Sphingosines     | 0.1425 | 0.0792 | 0.3754 | 0.0493 |
| Cer(d34:1)_Cer(d14:1/20:0)                 | Sphingosines     | 0.3461 | 0.0249 | 0.2615 | 0.0437 |
| Cer(d34:1)_Cer(d16:1/18:0)                 | Sphingosines     | 0.0271 | 0.0272 | 0.2471 | 0.0521 |
| Cer(d35:1)_Cer(d18:1/17:0)                 | Sphingosines     | 0.8037 | 0.0116 | 0.0097 | 0.4967 |
| Cer(d36:1)_Cer(d16:1/20:0)                 | Sphingosines     | 0.3403 | 0.0128 | 0.5389 | 0.1220 |
| Cer(d38:1)_Cer(d16:1/22:0)                 | Sphingosines     | 0.4131 | 0.0334 | 0.6445 | 0.3633 |
| Cer(d38:1)_Cer(d18:1/20:0)                 | Sphingosines     | 0.4131 | 0.0334 | 0.6445 | 0.3633 |
| Cer(d40:1)_Cer(d16:1/24:0)                 | Sphingosines     | 0.3832 | 0.0163 | 0.7859 | 0.0649 |
| Phytosphingosine                           | Sphingosines     | 0.8900 | 0.0403 | 0.8013 | 0.9347 |
| SM(d32:2)_SM(d32:2)                        | Sphingosines     | 0.3123 | 0.7868 | 0.0350 | 0.1940 |
| SM(d34:1+PO)_SM(d34:1(OH))                 | Sphingosines     | 0.5004 | 0.6913 | 0.0515 | 0.0040 |
| SM(d34:2)_SM(d34:2)                        | Sphingosines     | 0.0888 | 0.0301 | 0.3142 | 0.2514 |
| SM(d35:1)_SM(d35:1)                        | Sphingosines     | 0.4313 | 0.5069 | 0.0142 | 0.0106 |
| SM(d35:2)_SM(d35:2)                        | Sphingosines     | 0.1665 | 0.0130 | 0.3389 | 0.2896 |
| SM(d36:0)_SM(d36:0)                        | Sphingosines     | 0.7672 | 0.5019 | 0.4288 | 0.0447 |
| SM(d36:1)_SM(d36:1)                        | Sphingosines     | 0.5784 | 0.0281 | 0.2563 | 0.0027 |
| SM(d37:1)_SM(d37:1)                        | Sphingosines     | 0.8284 | 0.3843 | 0.0020 | 0.0051 |
| SM(d38:2)_SM(d38:2)                        | Sphingosines     | 0.0368 | 0.2335 | 0.0935 | 0.4995 |
| SM(d39:1)_SM(d39:1)                        | Sphingosines     | 0.9228 | 0.6200 | 0.1255 | 0.0007 |
| Glycerophosphoric acid                     | Phosphates       | 0.1171 | 0.2170 | 0.0015 | 0.0886 |
| Ala-Ala[alanyl-alanine]                    | Peptides         | 0.1431 | 0.4521 | 0.9602 | 0.0136 |
| Ala-Gly[alanyl-glycine]                    | Peptides         | 0.0901 | 0.0131 | 0.0394 | 0.0283 |
| gamma-Glu-Ile[gamma-Glutamylisoleucine]    | Peptides         | 0.4887 | 0.0794 | 0.9540 | 0.0221 |
| Glu-ala[gamma-Glutamylalanine]             | Peptides         | 0.0286 | 0.0214 | 0.0059 | 0.0055 |
| Glu-Met[gamma-Glutamyl-methionine]         | Peptides         | 0.5489 | 0.4201 | 0.0536 | 0.0073 |
| Gly-Gly[Gly-glycine]                       | Peptides         | 0.0209 | 0.0367 | 0.4749 | 0.6940 |
| Homo-L-arg[Homo-L-arginine]                | Peptides         | 0.2659 | 0.5684 | 0.0422 | 0.0305 |
| N,N,N-Trimethyl-L-alanyl-L-proline betaine | Peptides         | 0.7680 | 0.6988 | 0.0013 | 0.0022 |
| Ophthalmic acid(analogue glutathione)      | Peptides         | 0.2434 | 0.1983 | 0.0452 | 0.0444 |
| Val-Asp                                    | Peptides         | 0.4080 | 0.2003 | 0.0233 | 0.2412 |
| Val-Lys                                    | Peptides         | 0.3311 | 0.4475 | 0.0404 | 0.0828 |
| Val-Val                                    | Peptides         | 0.0002 | 0.0015 | 0.0001 | 0.0084 |
| (R)-3-Hydroxyisobutyric acid               | Organic acid     | 0.0395 | 0.3895 | 0.2396 | 0.3768 |
| (R)-b-aminoisobutyric acid                 | Organic acid     | 0.0191 | 0.7769 | 0.1854 | 0.5240 |
| (R)-beta-Hydroxybutyric acid               | Organic acid     | 0.0012 | 0.0009 | 0.0450 | 0.0004 |
| (S)-3,4-Dihydroxybutyric acid              | Organic acid     | 0.0001 | 0.0001 | 0.0003 | 0.0000 |

|                                |                             |        |        |        |        |
|--------------------------------|-----------------------------|--------|--------|--------|--------|
| (S)-3-Hydroxyisobutyric acid   | Orgnic acid                 | 0.0441 | 0.0012 | 0.1501 | 0.0016 |
| 2-Hydroxyglutarate             | Orgnic acid                 | 0.4197 | 0.0212 | 0.0114 | 0.0252 |
| 3-Oxoglutaric acid             | Orgnic acid                 | 0.1064 | 0.1310 | 0.0026 | 0.0099 |
| acetyl citrate                 | Orgnic acid                 | 0.1043 | 0.1290 | 0.0028 | 0.0108 |
| Aconitic acid                  | Orgnic acid                 | 0.6918 | 0.2601 | 0.0011 | 0.5353 |
| Adipic acid                    | Orgnic acid                 | 0.0000 | 0.0000 | 0.0000 | 0.0002 |
| beta-Hydroxybutyric acid       | Orgnic acid                 | 0.8284 | 0.2168 | 0.0013 | 0.1274 |
| cis-aconitic acid              | Orgnic acid                 | 0.0676 | 0.9664 | 0.0278 | 0.4627 |
| Citraconic acid                | Orgnic acid                 | 0.5956 | 0.2857 | 0.0009 | 0.2220 |
| Citric acid                    | Orgnic acid                 | 0.1272 | 0.4862 | 0.0368 | 0.1565 |
| Fumaric acid                   | Orgnic acid                 | 0.0013 | 0.2212 | 0.9817 | 0.0509 |
| Glutaconic acid                | Orgnic acid                 | 0.6253 | 0.2790 | 0.0009 | 0.2257 |
| Glutaric acid                  | Orgnic acid                 | 0.2211 | 0.9101 | 0.0071 | 0.0197 |
| Hydroxypropionic acid          | Orgnic acid                 | 0.0017 | 0.0041 | 0.0033 | 0.0001 |
| L-Malic acid                   | Orgnic acid                 | 0.0001 | 0.6339 | 0.7194 | 0.1074 |
| Methylglutaric acid            | Orgnic acid                 | 0.5864 | 0.9234 | 0.0033 | 0.0055 |
| Pyruvic acid                   | Orgnic acid                 | 0.1230 | 0.1368 | 0.0020 | 0.0065 |
| Succinic acid                  | Orgnic acid                 | 0.0087 | 0.1297 | 0.0001 | 0.3385 |
| Succinic acid semialdehyde     | Orgnic acid                 | 0.0000 | 0.0001 | 0.0005 | 0.0000 |
| 5'-Methylthioadenosine         | Nucleotide                  | 0.1604 | 0.2896 | 0.0034 | 0.1754 |
| 5-Methyluridine(Ribothymidine) | Nucleotide                  | 0.2122 | 0.0150 | 0.7140 | 0.4639 |
| Adenosine                      | Nucleotide                  | 0.0186 | 0.1223 | 0.6915 | 0.4259 |
| Adenosine monophosphate        | Nucleotide                  | 0.0671 | 0.0755 | 0.0959 | 0.2837 |
| Adenosine triphosphate         | Nucleotide                  | 0.4204 | 0.0421 | 0.6241 | 0.8344 |
| ADP                            | Nucleotide                  | 0.7442 | 0.3405 | 0.2047 | 0.7702 |
| Allantoin                      | Nucleotide                  | 0.3432 | 0.3535 | 0.0141 | 0.0991 |
| Citicoline                     | Nucleotide                  | 0.8714 | 0.1923 | 0.0489 | 0.0593 |
| Cytidine                       | Nucleotide                  | 0.8011 | 0.0133 | 0.3255 | 0.1019 |
| Guanosine                      | Nucleotide                  | 0.3927 | 0.5861 | 0.0047 | 0.0385 |
| Guanosine diphosphate          | Nucleotide                  | 0.0404 | 0.0965 | 0.0208 | 0.0528 |
| Hypoxanthine                   | Nucleotide                  | 0.7097 | 0.1303 | 0.0272 | 0.0950 |
| Inosine                        | Nucleotide                  | 0.0180 | 0.2234 | 0.0439 | 0.0254 |
| Inosinic acid                  | Nucleotide                  | 0.1945 | 0.8113 | 0.0015 | 0.0239 |
| Pseudouridine                  | Nucleotide                  | 0.0277 | 0.3746 | 0.7621 | 0.3627 |
| Succinyladenosine              | Nucleotide                  | 0.6616 | 0.0038 | 0.0082 | 0.0170 |
| Uracil                         | Nucleotide                  | 0.2218 | 0.2874 | 0.2419 | 0.0219 |
| Uric acid                      | Nucleotide                  | 0.4380 | 0.1599 | 0.0388 | 0.0091 |
| Uridine                        | Nucleotide                  | 0.0006 | 0.7071 | 0.0003 | 0.1979 |
| Uridine diphosphate-           | Nucleotide                  | 0.1245 | 0.0150 | 0.0042 | 0.2973 |
| N-acetylglucosamine            | Nucleotide                  | 0.5631 | 0.0496 | 0.0041 | 0.0105 |
| Xanthine                       | Nucleotide                  | 0.0024 | 0.0425 | 0.1142 | 0.9005 |
| LysoPS(18:0)                   | Glycerophosphoserines       | 0.1342 | 0.0449 | 0.4432 | 0.1701 |
| PS(36:2)_PS(18:0/18:2)         | Glycerophosphoserines       | 0.1845 | 0.0102 | 0.8028 | 0.0883 |
| PS(36:2)_PS(18:1/18:1)         | Glycerophosphoserines       | 0.1637 | 0.1453 | 0.0234 | 0.1018 |
| PS(40:6)_PS(18:0/22:6)         | Glycerophosphoserines       | 0.4419 | 0.1090 | 0.0075 | 0.1610 |
| LysoPI(0:0/18:0)               | Glycerophosphoinositols     | 0.0360 | 0.1119 | 0.3911 | 0.7594 |
| LysoPI(18:0/0:0)               | Glycerophosphoinositols     | 0.2429 | 0.4809 | 0.0383 | 0.0837 |
| LysoPI(18:2)                   | Glycerophosphoinositols     | 0.0035 | 0.3015 | 0.6203 | 0.1827 |
| PI(32:0)_PI(16:0/16:0)         | Glycerophosphoinositols     | 0.2846 | 0.0909 | 0.0012 | 0.0064 |
| PI(32:1)_PI(16:0/16:1)         | Glycerophosphoinositols     | 0.7319 | 0.7857 | 0.0322 | 0.5516 |
| PI(34:1)_PI(16:0/18:1)         | Glycerophosphoinositols     | 0.1758 | 0.1061 | 0.0102 | 0.2080 |
| PI(34:2)_PI(16:0/18:2)         | Glycerophosphoinositols     | 0.4911 | 0.2465 | 0.0029 | 0.0185 |
| PI(36:2)_PI(18:1/18:1)         | Glycerophosphoinositols     | 0.2378 | 0.3246 | 0.3405 | 0.0306 |
| PI(36:3)_PI(18:1/18:2)         | Glycerophosphoinositols     | 0.0161 | 0.1386 | 0.9312 | 0.1589 |
| PI(38:3)_PI(18:0/20:3)         | Glycerophosphoinositols     | 0.5363 | 0.7524 | 0.0019 | 0.8372 |
| PG(34:1)_PG(16:0/18:1)         | Glycerophosphoglycerols     | 0.0653 | 0.3558 | 0.0016 | 0.2819 |
| PG(34:2)_PG(16:0/18:2)         | Glycerophosphoglycerols     | 0.0653 | 0.3558 | 0.0016 | 0.2819 |
| PG(34:2)_PG(16:1/18:1)         | Glycerophosphoglycerols     | 0.4852 | 0.9056 | 0.0471 | 0.9816 |
| PG(36:1)_PG(36:1)              | Glycerophosphoglycerols     | 0.4456 | 0.3424 | 0.0009 | 0.0512 |
| PG(36:2)_PG(18:1/18:1)         | Glycerophosphoglycerols     | 0.1576 | 0.5889 | 0.0226 | 0.2398 |
| PG(36:3)_PG(18:1/18:2)         | Glycerophosphoglycerols     | 0.0783 | 0.0866 | 0.0509 | 0.0201 |
| PG(36:5)_PG(18:3/18:2)         | Glycerophosphoglycerols     | 0.1798 | 0.4282 | 0.1595 | 0.0281 |
| LysoPE(0:0/16:0)               | Glycerophosphoethanolamines | 0.6095 | 0.7689 | 0.0220 | 0.1324 |
| LysoPE(0:0/18:2)               | Glycerophosphoethanolamines | 0.2182 | 0.3881 | 0.1016 | 0.0443 |
| LysoPE(16:0/0:0)               | Glycerophosphoethanolamines | 0.3211 | 0.2904 | 0.5554 | 0.0396 |
| LysoPE(17:0/0:0)               | Glycerophosphoethanolamines | 0.7532 | 0.8015 | 0.0314 | 0.1937 |
| LysoPE(18:2/0:0)               | Glycerophosphoethanolamines | 0.0075 | 0.6795 | 0.7755 | 0.1640 |
| PE(30:0)_PE(16:0/14:0)         | Glycerophosphoethanolamines | 0.0008 | 0.0598 | 0.1995 | 0.6024 |
| PE(32:1)_PE(16:0/16:1)         | Glycerophosphoethanolamines | 0.1778 | 0.0619 | 0.0390 | 0.0047 |
| PE(32:1p)_PE(16:0p/16:1)       | Glycerophosphoethanolamines | 0.0001 | 0.2208 | 0.0734 | 0.0138 |
| PE(33:1)_PE(17:1/16:0)         | Glycerophosphoethanolamines |        |        |        |        |

|                                |                              |        |        |        |        |
|--------------------------------|------------------------------|--------|--------|--------|--------|
| PE(33:3)_PE(33:3)              | Glycerophosphoethanola mines | 0.0415 | 0.2062 | 0.2731 | 0.9260 |
| PE(34:0)_PE(18:0/16:0)         | Glycerophosphoethanola mines | 0.0151 | 0.0044 | 0.3554 | 0.3395 |
| PE(34:1)_PE(16:0/18:1)         | Glycerophosphoethanola mines | 0.0109 | 0.1225 | 0.0246 | 0.1433 |
| PE(34:1p)_PE(34:1p)            | Glycerophosphoethanola mines | 0.0095 | 0.4494 | 0.0488 | 0.9320 |
| PE(34:2)_PE(16:0/18:2)         | Glycerophosphoethanola mines | 0.0120 | 0.5027 | 0.0292 | 0.5920 |
| PE(34:2)_PE(16:1/18:1)         | Glycerophosphoethanola mines | 0.0120 | 0.5027 | 0.0292 | 0.5920 |
| PE(34:2p)_PE(34:2p)            | Glycerophosphoethanola mines | 0.0657 | 0.9401 | 0.0306 | 0.2225 |
| PE(35:2)_PE(17:1/18:1)         | Glycerophosphoethanola mines | 0.1370 | 0.9868 | 0.0002 | 0.0008 |
| PE(35:2p)_PE(18:1p/17:1)       | Glycerophosphoethanola mines | 0.4078 | 0.7598 | 0.0211 | 0.0101 |
| PE(35:3)_PE(17:1/18:2)         | Glycerophosphoethanola mines | 0.0009 | 0.1555 | 0.0449 | 0.1628 |
| PE(35:4)_PE(17:1/18:3)         | Glycerophosphoethanola mines | 0.0335 | 0.0843 | 0.4091 | 0.4986 |
| PE(36:1)_PE(18:0/18:1)         | Glycerophosphoethanola mines | 0.2036 | 0.9895 | 0.0468 | 0.2070 |
| PE(36:1p)_PE(36:1p)            | Glycerophosphoethanola mines | 0.8955 | 0.0664 | 0.1494 | 0.0098 |
| PE(36:2)_PE(18:0/18:2)         | Glycerophosphoethanola mines | 0.1846 | 0.0171 | 0.0014 | 0.0299 |
| PE(36:2)_PE(18:1/18:1)         | Glycerophosphoethanola mines | 0.0545 | 0.6526 | 0.0261 | 0.2481 |
| PE(36:2p)_PE(18:0p/18:2)       | Glycerophosphoethanola mines | 0.9615 | 0.0469 | 0.0131 | 0.0362 |
| PE(36:3)_PE(18:1/18:2)         | Glycerophosphoethanola mines | 0.0005 | 0.0780 | 0.0402 | 0.1861 |
| PE(36:3p)_PE(P-16:0/20:3n6)    | Glycerophosphoethanola mines | 0.3412 | 0.0489 | 0.0233 | 0.4673 |
| PE(36:3p)_PE(P-16:0/20:3n9)    | Glycerophosphoethanola mines | 0.3412 | 0.0489 | 0.0233 | 0.4673 |
| PE(36:3p)_PE(P-18:1/18:2)      | Glycerophosphoethanola mines | 0.3418 | 0.0491 | 0.0233 | 0.4674 |
| PE(36:6)_PE(18:3/18:3)         | Glycerophosphoethanola mines | 0.1351 | 0.1914 | 0.0042 | 0.1378 |
| PE(37:2)_PE(19:0/18:2)         | Glycerophosphoethanola mines | 0.5844 | 0.4549 | 0.0001 | 0.0008 |
| PE(37:2)_PE(19:1/18:1)         | Glycerophosphoethanola mines | 0.9693 | 0.2733 | 0.0035 | 0.0069 |
| PE(37:3)_PE(19:0/18:3)         | Glycerophosphoethanola mines | 0.0947 | 0.5583 | 0.0026 | 0.0383 |
| PE(38:1)_PE(20:0/18:1)         | Glycerophosphoethanola mines | 0.1312 | 0.5571 | 0.0028 | 0.0194 |
| PE(38:1)_PE(38:1)              | Glycerophosphoethanola mines | 0.1730 | 0.9551 | 0.0065 | 0.0004 |
| PE(38:1p)_PE(18:0p/20:1)       | Glycerophosphoethanola mines | 0.0605 | 0.0261 | 0.3050 | 0.0071 |
| PE(38:2)_PE(20:0/18:2)         | Glycerophosphoethanola mines | 0.4122 | 0.0579 | 0.0468 | 0.1052 |
| PE(38:2p)_PE(38:2p)            | Glycerophosphoethanola mines | 0.2431 | 0.0408 | 0.0137 | 0.0325 |
| PE(38:3p)_PE(18:0p/20:3)       | Glycerophosphoethanola mines | 0.7985 | 0.0718 | 0.0426 | 0.0263 |
| PE(38:3p)_PE(18:0p/20:3)isomer | Glycerophosphoethanola mines | 0.8809 | 0.0324 | 0.3511 | 0.6809 |
| PE(38:4)_PE(20:1/18:3)         | Glycerophosphoethanola mines | 0.3810 | 0.4449 | 0.0242 | 0.1881 |
| PE(38:4)_PE(20:2/18:2)         | Glycerophosphoethanola mines | 0.0615 | 0.0082 | 0.7288 | 0.5773 |
| PE(38:5)_PE(18:0/20:5)         | Glycerophosphoethanola mines | 0.0370 | 0.1724 | 0.4914 | 0.6832 |
| PE(40:2)_PE(18:1/22:1)         | Glycerophosphoethanola mines | 0.3309 | 0.0650 | 0.0031 | 0.0015 |
| PE(40:5)_PE(18:1/22:4)         | Glycerophosphoethanola mines | 0.0745 | 0.8285 | 0.0061 | 0.0014 |
| PE(42:4)_PE(22:0/20:4)         | Glycerophosphoethanola mines | 0.9172 | 0.5782 | 0.2425 | 0.0100 |
| LysoPC(0:0/14:0)               | Glycerophosphocholines       | 0.3211 | 0.2904 | 0.5554 | 0.0396 |
| LysoPC(0:0/15:0)               | Glycerophosphocholines       | 0.0280 | 0.1403 | 0.4780 | 0.2908 |
| LysoPC(0:0/18:1)               | Glycerophosphocholines       | 0.3146 | 0.6806 | 0.0069 | 0.9693 |
| LysoPC(0:0/18:2)               | Glycerophosphocholines       | 0.9331 | 0.8712 | 0.0008 | 0.0985 |
| LysoPC(0:0/18:3)               | Glycerophosphocholines       | 0.5406 | 0.2741 | 0.0205 | 0.2795 |
| LysoPC(14:0/0:0)               | Glycerophosphocholines       | 0.3211 | 0.2904 | 0.5554 | 0.0396 |
| LysoPC(15:0/0:0)               | Glycerophosphocholines       | 0.0280 | 0.1403 | 0.4780 | 0.2908 |

|                                                    |                        |        |        |        |        |
|----------------------------------------------------|------------------------|--------|--------|--------|--------|
| LysoPC(17:0/0:0)                                   | Glycerophosphocholines | 0.0420 | 0.1976 | 0.1331 | 0.3641 |
| LysoPC(18:0e)                                      | Glycerophosphocholines | 0.0000 | 0.0318 | 0.1084 | 0.6030 |
| LysoPC(18:0p)                                      | Glycerophosphocholines | 0.0015 | 0.0608 | 0.6145 | 0.4820 |
| LysoPC(18:1/0:0)                                   | Glycerophosphocholines | 0.2365 | 0.4916 | 0.0057 | 0.9742 |
| LysoPC(18:2/0:0)                                   | Glycerophosphocholines | 0.6404 | 0.6510 | 0.0010 | 0.0584 |
| LysoPC(18:3/0:0)                                   | Glycerophosphocholines | 0.5148 | 0.3545 | 0.0149 | 0.3184 |
| PC(30:0)_PC(30:0)                                  | Glycerophosphocholines | 0.0034 | 0.0062 | 0.5870 | 0.7681 |
| PC(30:0e)_PC(30:0e)                                | Glycerophosphocholines | 0.0423 | 0.3564 | 0.2932 | 0.8603 |
| PC(30:1)_PC(16:1/14:0)                             | Glycerophosphocholines | 0.4640 | 0.3951 | 0.0462 | 0.2209 |
| PC(31:1)_PC(17:1/14:0)                             | Glycerophosphocholines | 0.0029 | 0.0357 | 0.0757 | 0.7265 |
| PC(31:1)_PC(31:1)                                  | Glycerophosphocholines | 0.0751 | 0.0058 | 0.9649 | 0.7436 |
| PC(32:0)_PC(16:0/16:0)                             | Glycerophosphocholines | 0.0117 | 0.0341 | 0.9467 | 0.6563 |
| PC(32:1)_PC(16:0/16:1)                             | Glycerophosphocholines | 0.0009 | 0.1749 | 0.0208 | 0.5720 |
| PC(32:1e)_PC(32:1e)                                | Glycerophosphocholines | 0.1200 | 0.7088 | 0.9349 | 0.0137 |
| PC(32:2)_PC(14:0/18:2)                             | Glycerophosphocholines | 0.2406 | 0.0678 | 0.0030 | 0.8484 |
| PC(32:4)_PC(32:4)                                  | Glycerophosphocholines | 0.0335 | 0.0843 | 0.4091 | 0.4986 |
| PC(33:1)_PC(17:1/16:0)                             | Glycerophosphocholines | 0.0033 | 0.0050 | 0.0605 | 0.0215 |
| PC(33:2)_PC(33:2)                                  | Glycerophosphocholines | 0.0059 | 0.1353 | 0.0772 | 0.0763 |
| PC(33:3)_PC(15:0/18:3)                             | Glycerophosphocholines | 0.0245 | 0.0869 | 0.4129 | 0.3729 |
| PC(34:1)_PC(16:0/18:1)                             | Glycerophosphocholines | 0.0147 | 0.0309 | 0.0128 | 0.0673 |
| PC(34:2)_PC(16:0/18:2)                             | Glycerophosphocholines | 0.0005 | 0.5162 | 0.0014 | 0.0119 |
| PC(35:2)_PC(17:0/18:2)                             | Glycerophosphocholines | 0.5398 | 0.2659 | 0.0006 | 0.0053 |
| PC(35:2)_PC(35:2)                                  | Glycerophosphocholines | 0.0456 | 0.1753 | 0.0189 | 0.0053 |
| PC(35:4)_PC(17:1/18:3)                             | Glycerophosphocholines | 0.0250 | 0.1164 | 0.1350 | 0.9515 |
| PC(36:1)_PC(18:0/18:1)                             | Glycerophosphocholines | 0.7220 | 0.7775 | 0.0973 | 0.0192 |
| PC(36:1e)_PC(36:1e)                                | Glycerophosphocholines | 0.8350 | 0.7072 | 0.0174 | 0.5462 |
| PC(36:1p)_PC(18:0p/18:1)                           | Glycerophosphocholines | 0.2230 | 0.0452 | 0.0018 | 0.1475 |
| PC(36:2)_PC(18:0/18:2)                             | Glycerophosphocholines | 0.3175 | 0.0297 | 0.0003 | 0.0005 |
| PC(36:2e)_PC(36:2e)                                | Glycerophosphocholines | 0.4915 | 0.1649 | 0.0276 | 0.1221 |
| PC(36:3)_PC(16:0/20:3)                             | Glycerophosphocholines | 0.6184 | 0.1909 | 0.0003 | 0.0147 |
| PC(36:3)_PC(18:0/18:3)                             | Glycerophosphocholines | 0.0012 | 0.0865 | 0.1290 | 0.1576 |
| PC(36:3)_PC(18:1/18:2)                             | Glycerophosphocholines | 0.0012 | 0.0865 | 0.1290 | 0.1576 |
| PC(36:4e)_PC(36:4e)                                | Glycerophosphocholines | 0.0386 | 0.0216 | 0.7419 | 0.9970 |
| PC(36:6)_PC(18:3/18:3)                             | Glycerophosphocholines | 0.5827 | 0.0549 | 0.0074 | 0.1657 |
| PC(37:1)_PC(19:1/18:0)                             | Glycerophosphocholines | 0.8396 | 0.9350 | 0.1076 | 0.0020 |
| PC(37:2)_PC(37:2)mixture                           | Glycerophosphocholines | 0.4625 | 0.7661 | 0.0463 | 0.6456 |
| PC(38:1)_PC(22:0/16:1)                             | Glycerophosphocholines | 0.3095 | 0.0916 | 0.3937 | 0.0361 |
| PC(38:2)_PC(18:0/20:2)                             | Glycerophosphocholines | 0.3427 | 0.9625 | 0.0337 | 0.5346 |
| PC(38:2)_PC(38:2)                                  | Glycerophosphocholines | 0.8076 | 0.0112 | 0.0243 | 0.0035 |
| PC(38:3)_PC(18:0/20:3)                             | Glycerophosphocholines | 0.1424 | 0.9631 | 0.0018 | 0.1477 |
| PC(38:3)_PC(18:1/20:2)                             | Glycerophosphocholines | 0.5127 | 0.0017 | 0.7260 | 0.4916 |
| PC(38:3e)_PC(38:3e)                                | Glycerophosphocholines | 0.0225 | 0.0011 | 0.8901 | 0.5258 |
| PC(38:4)_PC(18:0/20:4)                             | Glycerophosphocholines | 0.6961 | 0.5107 | 0.0840 | 0.0115 |
| PC(38:4)_PC(18:1/20:3)                             | Glycerophosphocholines | 0.0139 | 0.0469 | 0.0250 | 0.0012 |
| PC(38:4e)_PC(38:4e)                                | Glycerophosphocholines | 0.1086 | 0.0040 | 0.7113 | 0.7184 |
| PC(38:4p)_PC(38:4p)                                | Glycerophosphocholines | 0.6136 | 0.3295 | 0.0086 | 0.0299 |
| PC(38:6p)_PC(38:6p)                                | Glycerophosphocholines | 0.8031 | 0.0686 | 0.0470 | 0.2048 |
| 2-trans,4-cis-Decadienoylcarnitine(acCa(10:2)9,12- | Fatty acyl carnitines  | 0.0027 | 0.2436 | 0.0374 | 0.3057 |
| Hexadecadienoylcarnitine(acCa(16:2)6:2)            | Fatty acyl carnitines  | 0.0005 | 0.1446 | 0.7891 | 0.1575 |
| arachidonoylcarnitineacCa(20:4)                    | Fatty acyl carnitines  | 0.3769 | 0.9944 | 0.4417 | 0.0113 |
| arachidylcarnitineacCa(20:0)                       | Fatty acyl carnitines  | 0.0900 | 0.0312 | 0.8674 | 0.0110 |
| Butyrylcarnitine(acCa(4:0)cis-5-                   | Fatty acyl carnitines  | 0.0063 | 0.0543 | 0.0458 | 0.0004 |
| Tetradecenoylcarnitine(acCa(14:1)                  | Fatty acyl carnitines  | 0.0068 | 0.3714 | 0.5372 | 0.3866 |
| EicosenoylcarnitineacCa(20:1)                      | Fatty acyl carnitines  | 0.6747 | 0.6389 | 0.9761 | 0.0287 |
| Hexanoylcarnitine(acCa(6:0)                        | Fatty acyl carnitines  | 0.2843 | 0.2070 | 0.3559 | 0.0033 |
| Hydroxyhexadecanoylcarnitine(acCa(16:0-OH)         | Fatty acyl carnitines  | 0.0163 | 0.0647 | 0.6519 | 0.5201 |
| L-acetylcarnitine                                  | Fatty acyl carnitines  | 0.7330 | 0.0573 | 0.0115 | 0.3555 |
| Linolenyl carnitineacCa(18:3)                      | Fatty acyl carnitines  | 0.0047 | 0.0060 | 0.1238 | 0.0083 |
| Linoleyl carnitine                                 | Fatty acyl carnitines  | 0.0026 | 0.0079 | 0.8389 | 0.0224 |
| L-Palmitoylcarnitine(AcCa(16:0)                    | Fatty acyl carnitines  | 0.0360 | 0.0909 | 0.8622 | 0.1675 |
| Malonylcarnitine                                   | Fatty acyl carnitines  | 0.1171 | 0.0099 | 0.0409 | 0.0875 |
| Oleoylcarnitine(acCa(18:1)                         | Fatty acyl carnitines  | 0.0176 | 0.1357 | 0.8641 | 0.6290 |
| Propionylcarnitine(acCa(3:0)                       | Fatty acyl carnitines  | 0.0007 | 0.3107 | 0.0152 | 0.0352 |
| Succinylcarnitine                                  | Fatty acyl carnitines  | 0.0106 | 0.0136 | 0.0005 | 0.0004 |
| Tetradecadienecarnitine(AcCa14:2)                  | Fatty acyl carnitines  | 0.0020 | 0.3939 | 0.4462 | 0.2522 |
| Tetradecanoylcarnitine(acCa(14:0)                  | Fatty acyl carnitines  | 0.0420 | 0.5687 | 0.7654 | 0.4241 |
| Tetradecenoylcarnitine(acCa(14:1)                  | Fatty acyl carnitines  | 0.4267 | 0.6104 | 0.4790 | 0.0345 |
| 13S-hydroxyoctadecadienoic acid                    | Fatty acid             | 0.7481 | 0.6893 | 0.0235 | 0.0697 |
| 7Z,10Z-Hexadecadienoic acid(FFA(16:2)              | Fatty acid             | 0.0685 | 0.1917 | 0.8583 | 0.0081 |
| 9,10,13-TriHOME                                    | Fatty acid             | 0.6953 | 0.9400 | 0.0207 | 0.1538 |
| 9,12,13-TriHOME                                    | Fatty acid             | 0.6840 | 0.9270 | 0.0202 | 0.1070 |
| alpha-Linolenic acid                               | Fatty acid             | 0.0492 | 0.5171 | 0.8177 | 0.7572 |
| Dodecanoic acid(FFA(12:0)                          | Fatty acid             | 0.8479 | 0.5543 | 0.1773 | 0.0184 |
| Gamma-Linolenic acid                               | Fatty acid             | 0.0492 | 0.5171 | 0.8177 | 0.7572 |
| Palmitoleic acid(FFA(16:1)                         | Fatty acid             | 0.1475 | 0.0211 | 0.6999 | 0.0602 |

|                                    |                 |        |        |        |        |
|------------------------------------|-----------------|--------|--------|--------|--------|
| Pentadecanoic acid(FFA(15:0)       | Fatty acid      | 0.5248 | 0.0096 | 0.5694 | 0.4453 |
| Diisobutyl phthalate               | Exogenous       | 0.0275 | 0.9129 | 0.7554 | 0.4402 |
| DG(32:1)_DG(18:1/14:0)             | Diacylglycerols | 0.0597 | 0.0717 | 0.3454 | 0.0184 |
| DG(32:2)_DG(14:0/18:2)             | Diacylglycerols | 0.0368 | 0.0389 | 0.2982 | 0.0047 |
| DG(32:3)_DG(14:0/18:3)             | Diacylglycerols | 0.0116 | 0.0165 | 0.3358 | 0.0043 |
| DG(34:0)_DG(18:0/16:0)             | Diacylglycerols | 0.0679 | 0.0743 | 0.0574 | 0.0126 |
| DG(34:1)_DG(16:0/18:1)             | Diacylglycerols | 0.1966 | 0.1086 | 0.1584 | 0.0488 |
| DG(34:2)_DG(16:0/18:2)             | Diacylglycerols | 0.0588 | 0.0597 | 0.1573 | 0.0125 |
| DG(34:2)_DG(16:1/18:1)             | Diacylglycerols | 0.0588 | 0.0597 | 0.1573 | 0.0125 |
| DG(34:3)_DG(16:1/18:2)             | Diacylglycerols | 0.1082 | 0.0377 | 0.7328 | 0.0101 |
| DG(35:2)_DG(17:0/18:2)             | Diacylglycerols | 0.0657 | 0.3337 | 0.0260 | 0.0371 |
| DG(35:3)_DG(17:0/18:3)             | Diacylglycerols | 0.4477 | 0.5959 | 0.5103 | 0.0139 |
| DG(35:3)_DG(17:1/18:2)             | Diacylglycerols | 0.1176 | 0.0280 | 0.2582 | 0.0048 |
| DG(36:2)_DG(18:0/18:2)             | Diacylglycerols | 0.0371 | 0.0600 | 0.0641 | 0.0085 |
| DG(36:3)_DG(18:0/18:3)             | Diacylglycerols | 0.0581 | 0.0598 | 0.1355 | 0.0308 |
| DG(36:3)_DG(18:1/18:2)             | Diacylglycerols | 0.0103 | 0.0169 | 0.5596 | 0.0045 |
| DG(36:4)_DG(18:2/18:2)             | Diacylglycerols | 0.2685 | 0.0581 | 0.0135 | 0.0418 |
| DG(36:6)_DG(18:3/18:3)             | Diacylglycerols | 0.2876 | 0.2195 | 0.0455 | 0.0045 |
| DG(37:4)_DG(19:1/18:3)             | Diacylglycerols | 0.3257 | 0.9378 | 0.8205 | 0.0014 |
| DG(38:3)_DG(18:0/20:3)1            | Diacylglycerols | 0.0928 | 0.0717 | 0.0831 | 0.0011 |
| DG(38:3)_DG(18:0/20:3)2            | Diacylglycerols | 0.8133 | 0.0182 | 0.8305 | 0.0011 |
| DG(38:4)_DG(18:1/20:3)             | Diacylglycerols | 0.1430 | 0.0381 | 0.4836 | 0.0010 |
| DG(38:5)_DG(18:2/18:3)             | Diacylglycerols | 0.2872 | 0.1263 | 0.3738 | 0.0105 |
| DG(38:5)_DG(18:3/20:2)             | Diacylglycerols | 0.2872 | 0.1263 | 0.3738 | 0.0105 |
| Glycerophosphocholine              | Cholines        | 0.0002 | 0.0011 | 0.0031 | 0.0000 |
| Phosphorylcholine                  | Cholines        | 0.3406 | 0.0432 | 0.0886 | 0.0272 |
| CL(68:5)_CL(18:2/16:1/16:1/18:1)   | Cardiolipins    | 0.7645 | 0.0832 | 0.0074 | 0.0004 |
| CL(68:6)_CL(18:3/16:0/16:0/18:3)   | Cardiolipins    | 0.7688 | 0.7834 | 0.0065 | 0.0024 |
| CL(70:5)_CL(18:2/18:1/16:1/18:1)   | Cardiolipins    | 0.9136 | 0.1682 | 0.1534 | 0.0326 |
| CL(70:8)_CL(18:3/18:2/16:0/18:3)   | Cardiolipins    | 0.1773 | 0.3146 | 0.0090 | 0.2722 |
| CL(70:9)_CL(18:3/16:0/18:3/18:3)   | Cardiolipins    | 0.3894 | 0.1137 | 0.0003 | 0.0117 |
| CL(72:10)_CL(18:3/18:2/18:3/18:2)  | Cardiolipins    | 0.4136 | 0.3314 | 0.0232 | 0.0060 |
| CL(72:11)_CL(18:3/18:2/18:3/18:3)  | Cardiolipins    | 0.1087 | 0.1458 | 0.1386 | 0.0236 |
| CL(72:8)_CL(18:3/18:1/18:2/18:2)   | Cardiolipins    | 0.5108 | 0.1073 | 0.0419 | 0.0047 |
| arabinonic acid                    | Carbohydrates   | 0.8643 | 0.1290 | 0.8810 | 0.0359 |
| D-Arabinose 5-phosphate            | Carbohydrates   | 0.1221 | 0.0221 | 0.2254 | 0.1627 |
| D-arabitol                         | Carbohydrates   | 0.7719 | 0.6688 | 0.0025 | 0.3313 |
| D-Glucose                          | Carbohydrates   | 0.0001 | 0.0002 | 0.0004 | 0.0000 |
| Disaccharide 1                     | Carbohydrates   | 0.0020 | 0.0059 | 0.0006 | 0.0010 |
| Disaccharide 2                     | Carbohydrates   | 0.0000 | 0.0009 | 0.0001 | 0.0002 |
| Disaccharide 3                     | Carbohydrates   | 0.6586 | 0.3713 | 0.0021 | 0.0161 |
| D-Ribose                           | Carbohydrates   | 0.0001 | 0.0002 | 0.0005 | 0.0000 |
| D-Ribulose 5-phosphate             | Carbohydrates   | 0.1234 | 0.0216 | 0.1555 | 0.1710 |
| D-Sedoheptulose 7-phosphate        | Carbohydrates   | 0.0605 | 0.0545 | 0.0022 | 0.0019 |
| D-Xylitol                          | Carbohydrates   | 0.7423 | 0.0000 | 0.0751 | 0.5553 |
| Fructose 6-phosphate               | Carbohydrates   | 0.0040 | 0.0472 | 0.0158 | 0.0353 |
| Galacturonic acid                  | Carbohydrates   | 0.0625 | 0.5184 | 0.0003 | 0.0004 |
| Gluconic acid                      | Carbohydrates   | 0.0410 | 0.6708 | 0.1431 | 0.1239 |
| Gluconolactone                     | Carbohydrates   | 0.0003 | 0.0458 | 0.0004 | 0.0000 |
| Glucosamine 6-phosphate            | Carbohydrates   | 0.0039 | 0.1003 | 0.0331 | 0.0230 |
| Glucose 1-phosphate                | Carbohydrates   | 0.0010 | 0.0360 | 0.0075 | 0.0173 |
| Glucose 6-phosphate                | Carbohydrates   | 0.0026 | 0.1152 | 0.0083 | 0.0141 |
| Glyceraldehyde                     | Carbohydrates   | 0.6355 | 0.1583 | 0.0120 | 0.4676 |
| Glycerol 3-phosphate               | Carbohydrates   | 0.0766 | 0.2586 | 0.0037 | 0.1668 |
| Glycogen                           | Carbohydrates   | 0.0001 | 0.0049 | 0.0016 | 0.0026 |
| Hexose3                            | Carbohydrates   | 0.0018 | 0.0083 | 0.0043 | 0.0022 |
| Hexose4                            | Carbohydrates   | 0.6104 | 0.3293 | 0.0477 | 0.0420 |
| Hexose5                            | Carbohydrates   | 0.7126 | 0.9989 | 0.0376 | 0.0124 |
| hexose-bisphosphate                | Carbohydrates   | 0.3685 | 0.0289 | 0.0078 | 0.1508 |
| Inositol phosphate                 | Carbohydrates   | 0.0024 | 0.1063 | 0.0068 | 0.0114 |
| L-arabitol                         | Carbohydrates   | 0.8716 | 0.0023 | 0.0551 | 0.5768 |
| Maltotetraose                      | Carbohydrates   | 0.0000 | 0.0142 | 0.0088 | 0.0076 |
| Maltotriose(multiple siomers)      | Carbohydrates   | 0.0000 | 0.0015 | 0.0001 | 0.0001 |
| Multiple Pentoses mixture          | Carbohydrates   | 0.2737 | 0.3696 | 0.0013 | 0.5725 |
| N-Acetyl-D-Glucosamine 6-Phosphate | Carbohydrates   | 0.6514 | 0.0021 | 0.2025 | 0.0206 |
| N-Fructosyl Valine                 | Carbohydrates   | 0.0004 | 0.0001 | 0.0295 | 0.0002 |
| Ribitol                            | Carbohydrates   | 0.6688 | 0.0002 | 0.0781 | 0.3877 |
| Ribonic acid                       | Carbohydrates   | 0.8643 | 0.1290 | 0.8810 | 0.0359 |
| Stachyose                          | Carbohydrates   | 0.0001 | 0.0049 | 0.0016 | 0.0026 |
| Trehalose                          | Carbohydrates   | 0.0009 | 0.0112 | 0.0062 | 0.0029 |
| (R)-2,3-Dihydroxy-3-methylvalerate | Amino acids     | 0.9946 | 0.2901 | 0.0018 | 0.0069 |
| 2-Hydroxyethanesulfonate           | Amino acids     | 0.2596 | 0.8713 | 0.0115 | 0.1094 |
| 2-Oxoarginine                      | Amino acids     | 0.0009 | 0.0359 | 0.1395 | 0.4580 |
| 3-Sulfinoalanine                   | Amino acids     | 0.0512 | 0.0447 | 0.0632 | 0.1956 |
| Agmatine                           | Amino acids     | 0.9869 | 0.1897 | 0.0130 | 0.1036 |
| allysine                           | Amino acids     | 0.0036 | 0.0037 | 0.0006 | 0.0021 |
| aspartylglycosamine                | Amino acids     | 0.0000 | 0.0008 | 0.0017 | 0.0000 |
| beta-alanine                       | Amino acids     | 0.8654 | 0.6800 | 0.0132 | 0.0014 |
| Dopaquinone                        | Amino acids     | 0.6240 | 0.0028 | 0.7788 | 0.0241 |



|                               |             |        |        |        |        |
|-------------------------------|-------------|--------|--------|--------|--------|
| Glutathione                   | Amino acids | 0.8581 | 0.3440 | 0.0135 | 0.4578 |
| Glutathione                   | Amino acids | 0.8581 | 0.3440 | 0.0135 | 0.4578 |
| Indoleacetaldehyde            | Amino acids | 0.0285 | 0.0361 | 0.8334 | 0.1046 |
| L-alanine                     | Amino acids | 0.5690 | 0.0851 | 0.0338 | 0.0011 |
| L-arginine                    | Amino acids | 0.4532 | 0.4423 | 0.8378 | 0.0134 |
| L-Glutamic acid               | Amino acids | 0.0016 | 0.2997 | 0.0015 | 0.2958 |
| L-Glutamine                   | Amino acids | 0.4155 | 0.9355 | 0.7319 | 0.0018 |
| L-Histidine                   | Amino acids | 0.0606 | 0.0406 | 0.0072 | 0.0044 |
| L-Isoleucine                  | Amino acids | 0.1411 | 0.1419 | 0.6863 | 0.0036 |
| L-Methionine                  | Amino acids | 0.9820 | 0.0102 | 0.0172 | 0.0126 |
| L-Proline                     | Amino acids | 0.0000 | 0.0000 | 0.0005 | 0.0000 |
| L-Threonine                   | Amino acids | 0.0115 | 0.7483 | 0.2317 | 0.8801 |
| L-Tryptophan                  | Amino acids | 0.8780 | 0.0458 | 0.3207 | 0.0260 |
| L-Tyrosine                    | Amino acids | 0.2369 | 0.0032 | 0.5250 | 0.0054 |
| N6,N6,N6-Trimethyl-L-lysine   | Amino acids | 0.8995 | 0.0089 | 0.1663 | 0.0008 |
| N-acetylaspartylglutamic acid | Amino acids | 0.0006 | 0.7290 | 0.0004 | 0.1228 |
| N-acetyldopamine              | Amino acids | 0.9077 | 0.0405 | 0.0318 | 0.0894 |
| N-acetylglutamine             | Amino acids | 0.0077 | 0.0011 | 0.7219 | 0.0030 |
| N-acetylhistidine             | Amino acids | 0.1782 | 0.0044 | 0.0784 | 0.6494 |
| N-acetylisoleucine            | Amino acids | 0.4569 | 0.6223 | 0.0469 | 0.3329 |
| N-acetyl-L-alanine            | Amino acids | 0.0132 | 0.1160 | 0.2464 | 0.7585 |
| N-acetyltaurine               | Amino acids | 0.1449 | 0.0011 | 0.8310 | 0.0002 |
| N-acetyltyramine              | Amino acids | 0.0356 | 0.0059 | 0.1744 | 0.7592 |
| N-acetylvaline                | Amino acids | 0.0502 | 0.0027 | 0.0561 | 0.0062 |
| N-Methylalanine               | Amino acids | 0.3541 | 0.0168 | 0.1387 | 0.1876 |
| N-oleoyltaurine               | Amino acids | 0.0056 | 0.0043 | 0.0578 | 0.0001 |
| N-oleoyltaurine               | Amino acids | 0.0065 | 0.0046 | 0.0639 | 0.0000 |
| O-acetylserine                | Amino acids | 0.0585 | 0.2374 | 0.0469 | 0.1971 |
| O-acetyltyramine              | Amino acids | 0.7453 | 0.0403 | 0.5955 | 0.7283 |
| Oxidized glutathione          | Amino acids | 0.7852 | 0.8135 | 0.0413 | 0.7997 |
| Palmitoylglycine              | Amino acids | 0.9647 | 0.3870 | 0.0331 | 0.1121 |
| Phosphoserine                 | Amino acids | 0.6821 | 0.3200 | 0.0274 | 0.7364 |
| Pyroglutamic acid             | Amino acids | 0.6927 | 0.5109 | 0.1306 | 0.0385 |
| Sarcosine                     | Amino acids | 0.9078 | 0.3517 | 0.0281 | 0.2255 |
| Spermidine                    | Amino acids | 0.5068 | 0.1181 | 0.2092 | 0.0498 |
| Suberylglycine                | Amino acids | 0.0027 | 0.0017 | 0.0846 | 0.1540 |

154  
155

**Table S2.** Primers used in this study

| Primer name       | Sequence,5'-3'                          | Description |
|-------------------|-----------------------------------------|-------------|
| <i>CS-T7F</i>     | TAATACGACTCACTATAGGGTGCGAAACTTCTGTGCTGG | CS-dsRNA    |
| <i>CS-T7R</i>     | TAATACGACTCACTATAGGCACCGATGCCCTTTGACTCT |             |
| <i>CS-rtF</i>     | GTACAGCGAGGGTGTCAACA                    | qPCR        |
| <i>CS-rtR</i>     | CACCGATGCCCTTTGACTCT                    |             |
| <i>PYK-rtF</i>    | TGTGCCCTCGACATTGACTC                    |             |
| <i>PYK-rtR</i>    | TTATCGTTTTCTGCGTGGTAT                   |             |
| <i>PGM-rtF</i>    | ACAACAAAACAGTCGCCTGC                    |             |
| <i>PGM-rtR</i>    | TGCAGCCAACTGTGCAAATC                    |             |
| <i>HK-rtF</i>     | CGCGAACAATGCAAAGAGCT                    |             |
| <i>HK-rtR</i>     | TTCTCCCAAGTCAAGTGCC                     |             |
| <i>GLY-rtF</i>    | CCGTTCCCTCCAGAACACAA                    |             |
| <i>GLY-rtR</i>    | GGCCTCCATTACCCAAACCA                    |             |
| <i>ALDO-rtF</i>   | GTTCCATTGTTTCGGCTCTGA                   |             |
| <i>ALDO-rtR</i>   | TAGCGTGCCAGAACATTAGC                    |             |
| <i>ACADVL-rtF</i> | GAGCCGAGCTGTACTGTCTC                    |             |
| <i>ACADVL-rtR</i> | TGACTGGCGTCTGAGCAAAT                    |             |
| <i>CPT1-rtF</i>   | AGGCAGTGAACGGTCATG                      |             |
| <i>CPT1-rtR</i>   | CATCTGGCACCAAGGGAG                      |             |
| <i>CPT2-rtF</i>   | GGACAGGGATTTGACAGAC                     |             |
| <i>CPT2-rtR</i>   | GCACCAGCCAGAACTACAT                     |             |
| <i>FABP-rtF</i>   | GCCGCAAGGTCAAGTCTATC                    |             |
| <i>FABP-rtR</i>   | TATTCTCGTCGCCACCAAGT                    |             |
| <i>COX4-rtF</i>   | GACCGAACGGACTTTCCCAT                    |             |
| <i>COX4-rtR</i>   | AGGTGCCTGGATTTCTGCAA                    |             |
| <i>COX7A-rtF</i>  | GGGTTGCACCACCAGTTAGA                    |             |
| <i>COX7A-rtR</i>  | GAACCGGAACACCATCTCGT                    |             |
| <i>ATPsyn-rtF</i> | GCGAATCCAGAAAATCCGCC                    |             |
| <i>ATPsyn-rtR</i> | GTGTGACGTTGTCAGGTGGA                    |             |
| <i>NDUF-rtF</i>   | ACAGAGCAGAAGCACGGAAA                    |             |
| <i>NDUF-rtR</i>   | TTTAGCCCTGCATTGCGGTA                    |             |

156
